# Supplementary material for: Performance enhancement of a supercapacitor negative electrode based on loofah sponge derived oxygen rich carbon through encapsulation of MoO3 nanoflowers
Source: Royal Society of Chemistry journal article supplement (doi:10.1039/c8se00562a), 2019-01-01
Supplement: c8se00562a1.pdf [file c8se00562a1.pdf]

## Supplementary Information †

### Performance enhancement of supercapacitor negative electrode based on loofah sponge derived oxygen rich carbon through encapsulation of MoO<sub>3</sub> nanoflowers

Akanksha Joshi, Vikrant Sahu, Gurmeet Singh\* and Raj Kishore Sharma\*\*

Department of Chemistry, University of Delhi, Delhi-110007, INDIA

The equations used to evaluate supercapacitor cell performance through Charge-Discharge measurements.<sup>1</sup>

$$C_{sp} = \frac{\int_{E1}^{E2} i(E) dE}{2(E2 - E1)m\vartheta} \quad (1)$$

$$C_m = \frac{I \times \Delta t}{m \times \Delta V} \quad (2)$$

$$E = \frac{0.5 \times C_m (\Delta V)^2}{3.6} \quad (3)$$

$$P = \frac{E \times 3600}{\Delta t} \quad (4)$$

where,  $C_{sp}$  is the specific capacitance (F g<sup>-1</sup>),  $\int_{E1}^{E2} i(E) dE$  is the integration of positive and negative sweep,  $i(E)$  is the instantaneous current, E1 and E2 are the cutoff potential of cyclic voltammetry, E2 - E1 is the working potential range,  $\vartheta$  is the scan rate,  $C_m$  capacitance of cell in F g<sup>-1</sup>,  $I$  is the current in mA,  $\Delta t$  is discharge time in s,  $m$  is active mass on two electrode in mg,  $\Delta V$  is the voltage after IR drop in V,  $E$  is the energy density in Wh Kg<sup>-1</sup>, and  $P$  is the power density in W Kg<sup>-1</sup>.

To determine the mechanism behind charge storage Power's law is implied using equation:<sup>2</sup>

$$i(V) = a v^b \quad (5)$$

Here,  $a$  and  $b$  are adjustable parameters and  $v$  is the scan rate ( $V s^{-1}$ ).

The following equation determines the contribution of current from capacitive and intercalation mechanism.<sup>3</sup>

$$i(V) = k_1(v) + k_2(v)^{\frac{1}{2}} \quad (6)$$

The value of  $k_1(v)$  and  $k_2(v)^{1/2}$  gives the current contribution from capacitive and diffusion controlled intercalation mechanism respectively.

The maximum specific capacitance was calculated from the low frequency data of Nyquist plot using equation:<sup>4</sup>

$$C_{dm} = \frac{-1}{2\pi f Z''m} \quad (7)$$

Here,  $C_{dm}$  is specific capacitance,  $Z''$  imaginary part of the impedance,  $f$  is subsequent frequency,  $m$  mass of the electrode material.

This  $C_{dm}$  is further used to determine electrochemically active surface (ESA) area by equation:<sup>5</sup>

$$S_E = \frac{C_{dm}}{C_d} \quad (8)$$

where,  $C_{dm}$  is obtained from the impedance data and  $C_d$  is a constant value of  $20 \mu F cm^{-2}$ .

Randles plot determines the diffusion coefficient of electrode material using following equations:<sup>6</sup>

$$Z' = R_s + R_{ct} + \sigma_w \cdot \omega^{-0.5} \quad (9)$$

$$D_w = \left[ \frac{RT}{\sqrt{2}AF^2\sigma_w C} \right]^2 \quad (10)$$

Here,  $\omega$  is angular frequency,  $\sigma_w$  corresponds to Warburg impedance coefficient and  $R_{ct}$  and  $R_s$  are charge transfer resistance and solution resistance respectively.  $D_w$  denotes diffusion coefficient in  $\text{cm}^2 \text{s}^{-1}$ ,  $R$  gas constant in  $\text{J K}^{-1} \text{mol}^{-1}$ ,  $A$  area of electrode in  $\text{cm}^2$ ,  $T$  absolute temperature in K,  $F$  Faraday constant in  $\text{C mol}^{-1}$ .

The conductivity of AC and 20 AC-MO is determined using the following equations:

$$R = \frac{\rho l}{a} \quad (11)$$

From the I-V plot, resistance (R) is determined and then from the above equation is used to find the resistivity ( $\rho$ ). Conductivity is inverse of the resistivity ( $\rho$ ).

| Sample | N (%) | C (%) | H (%) | S (%) | O (%) |
|--------|-------|-------|-------|-------|-------|
| AC     | 0.00  | 50.69 | 4.034 | 0.257 | 45.01 |

**Table S1.** CHNS analysis of Activated carbon (AC).

| Element | Position<br>BE (eV) | FWHM<br>(eV) | Raw<br>area (cps<br>eV) | RSF   | Atomic<br>mass | Atomic<br>conc (%) | Mass<br>conc (%) |
|---------|---------------------|--------------|-------------------------|-------|----------------|--------------------|------------------|
| C 1s    | 284.60              | 3.403        | 26453.3                 | 0.278 | 12.011         | 86.28              | 82.52            |
| O 1s    | 532.60              | 4.461        | 12906.7                 | 0.780 | 15.999         | 13.72              | 17.48            |

**Table S2.** Quantification report of Activated carbon (AC).

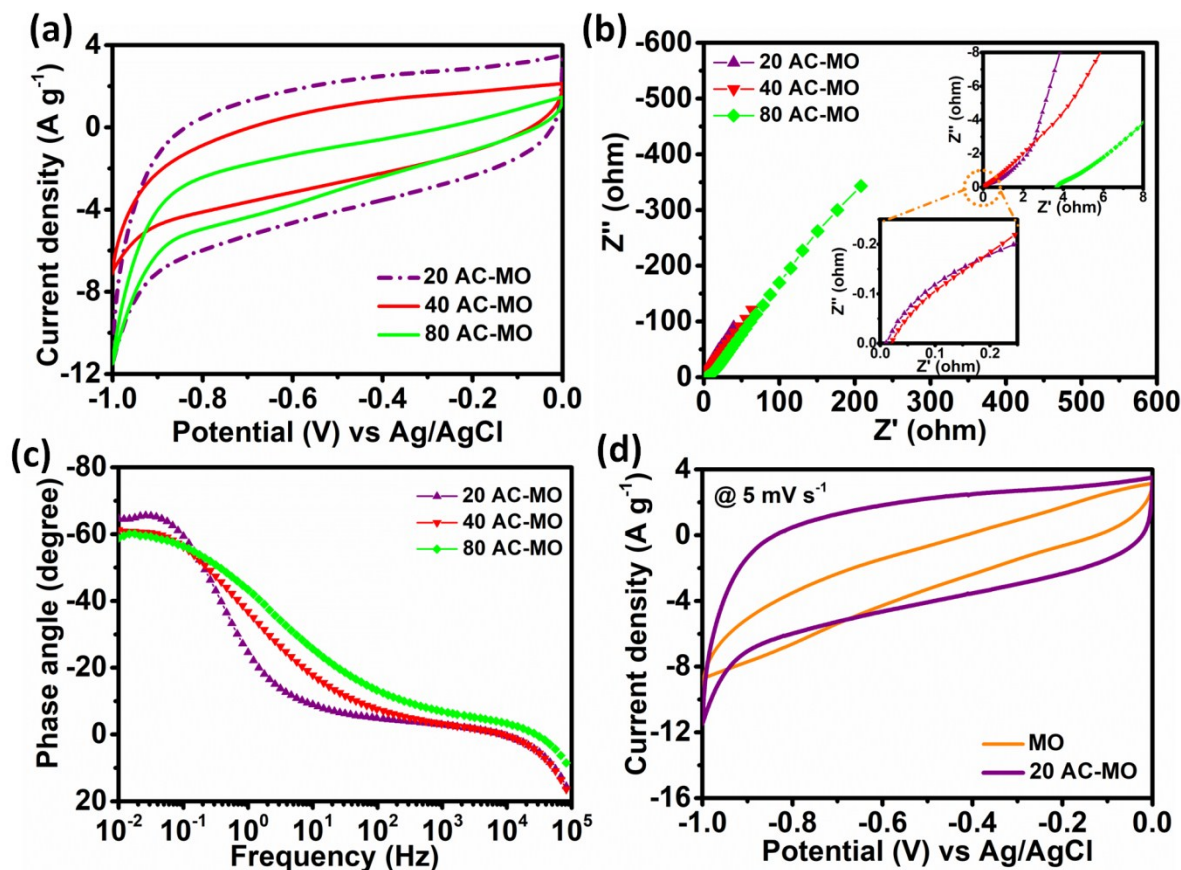

**Fig S1.** (a) Comparative voltammograms @ 5 mV s<sup>-1</sup>. (b) Nyquist plot. (c) Bode plot. (d) Comparison of MO and 20 AC-MO voltammograms.

The electrochemical performance of different AC:MO samples is investigated and the voltammograms are presented in Figure S1. Out of three composites electrodes, 20 AC-MO show larger current response. The oxygen functional groups in AC matrix and open nanoflower configuration offer additional active sites and optimum charge storage in 20 AC-MO composite indicating the balanced in ionic as well as electronic conductivity. Figure S1b, the Nyquist plot shows the minimum resistance (inset Figure S1c) in case of 20 AC-MO, which is based on the calculated values of  $R_1$  (solution resistance),  $R_2$  (charge transfer resistance),  $C_1$  (double layer capacitance) and  $W_1$  (warburg resistance) from the displayed equivalent circuit and is given in the table:

| Sample          | $R_1$ (ohm) | $R_2$ (ohm) | $C_1$ (Farad) | $W_1$ (ohm) |
|-----------------|-------------|-------------|---------------|-------------|
| <b>20 AC-MO</b> | 3.07        | 0.35        | 0.0005        | 7.82        |
| <b>40 AC-MO</b> | 2.60        | 0.35        | 0.0004        | 20          |
| <b>80 AC-MO</b> | 3.67        | 0.5         | 0.0003        | 25          |

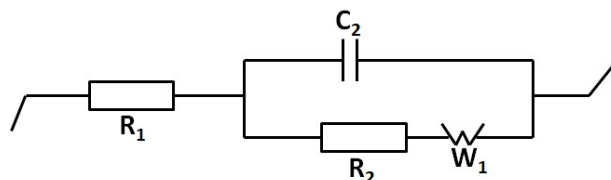

Likewise, bode plot in Figure S1c, illustrate more capacitive nature of 20 AC-MO with the highest bode angle ( $-65^\circ$ ). Despite of better conductivity of activated carbon (AC), the increase in content of carbon results in increase of overall resistance due to the uneven distribution of  $\text{MoO}_3$  nanostructures. As  $\text{MoO}_3$  nanostructure also reduces the diffusion distance of ions and hence results in a better performance of 20 AC-MO. Consequently, 20 AC-MO shows enhanced current as compared to the bare  $\text{MoO}_3$  (MO) in voltammograms (Figure S1d).

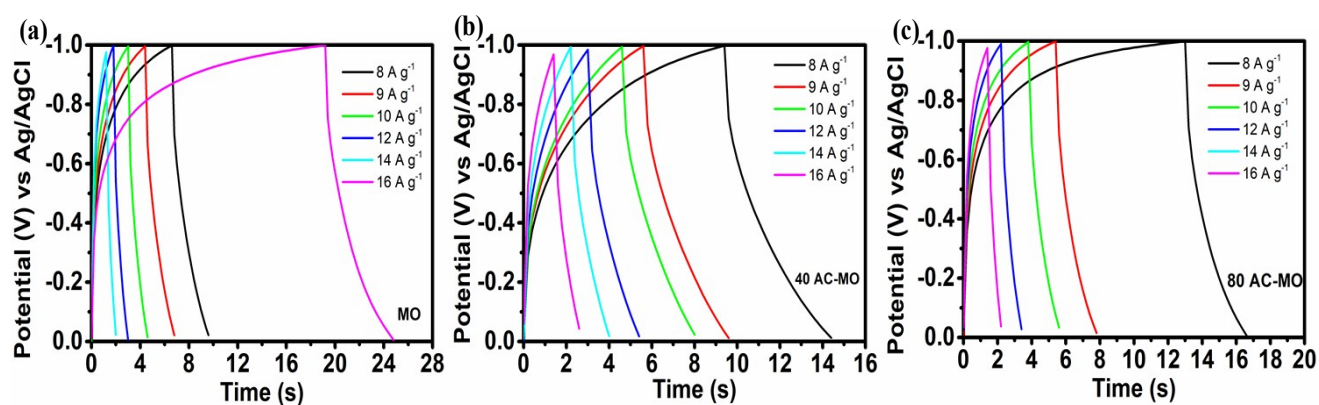

**Fig. S2** Charge discharge measurement of (a) MO (b) 40 AC-MO (c) 80 AC-MO.

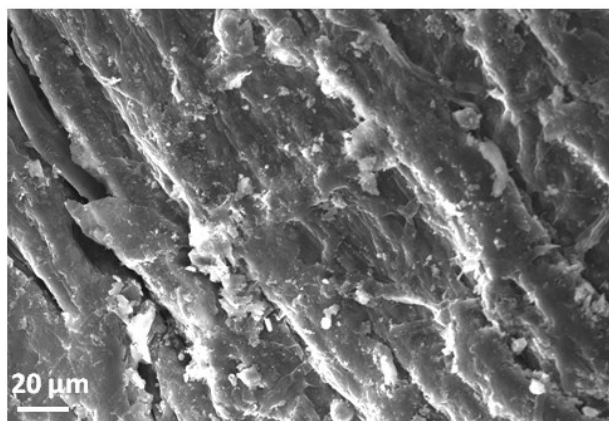

**Fig. S3** SEM image of loofah sponge.

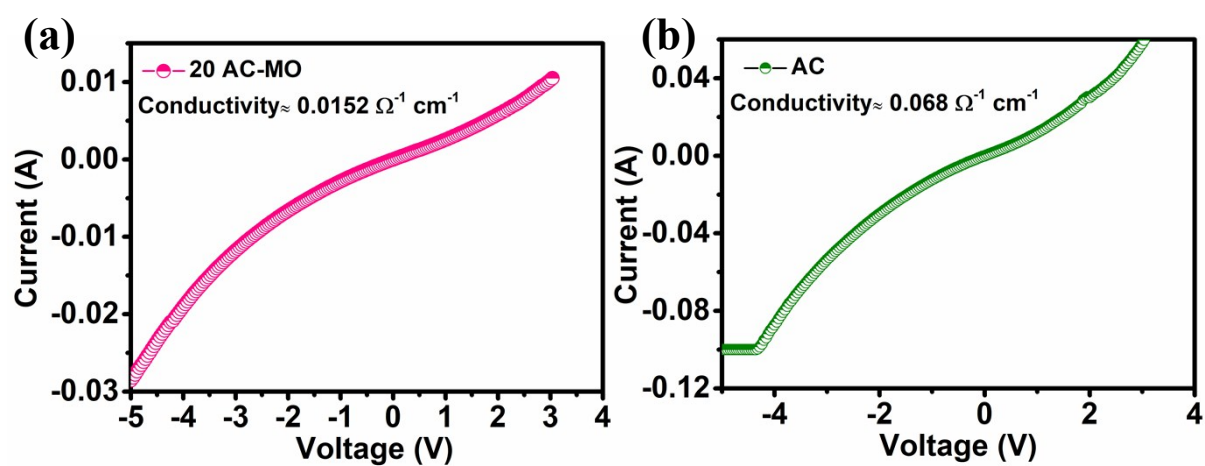

**Fig. S4** I-V measurement of (a) 20 AC-MO (b) AC.

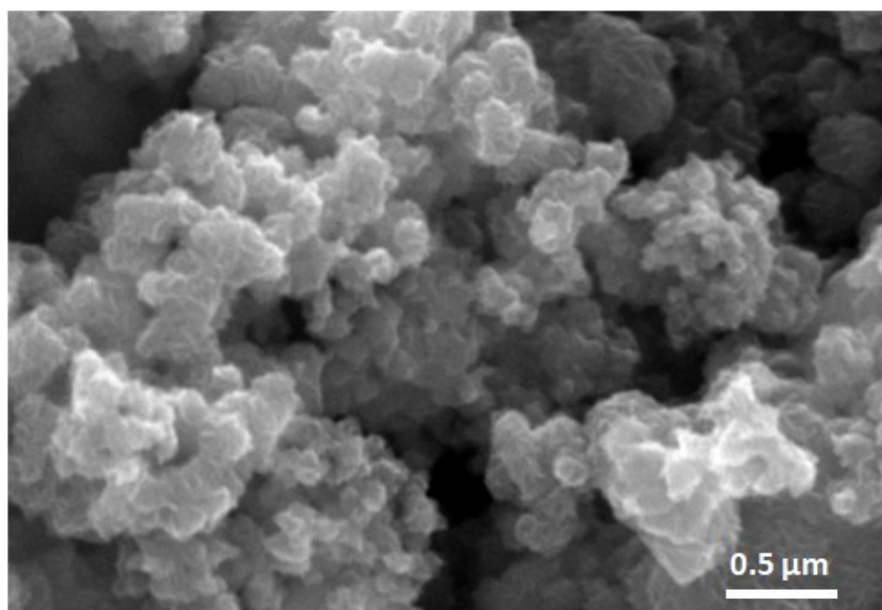

**Fig. S5** SEM image of MoO<sub>3</sub> (MO).

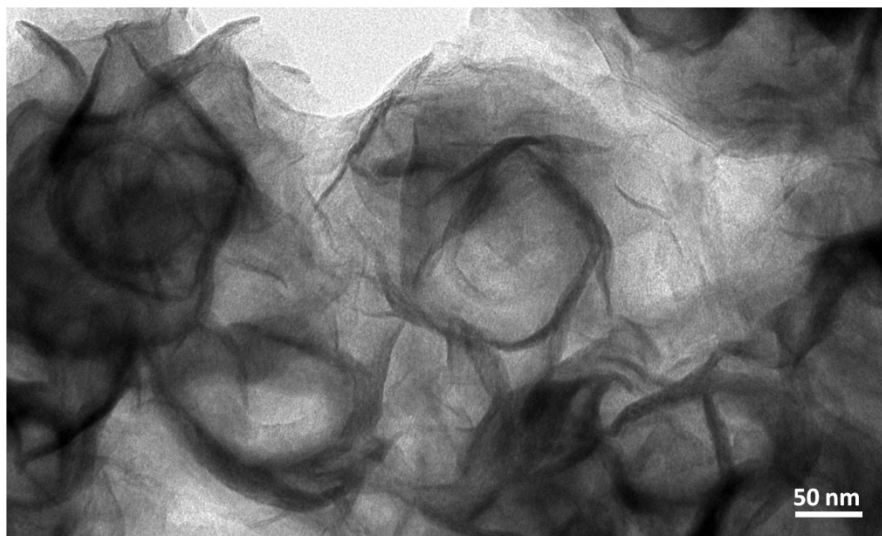

**Fig. S6** TEM image of 20 AC-MO.

### **Formation mechanism of MoO<sub>3</sub> (MO) onto the activated carbon (AC)**

When the (NH<sub>4</sub>)<sub>6</sub>(Mo)<sub>7</sub>O<sub>24</sub>, which acts as Mo<sup>6+</sup> ion source, was dissolved into the activated carbon dispersion, it produces MoO<sub>4</sub><sup>2-</sup> after certain time during hydrothermal process and in the mean time thiourea also produces S<sup>2-</sup> and reacts with above solution to form MoS<sub>3</sub> which then decomposed to form MoO<sub>3</sub>. In this process, first the MoO<sub>3</sub> nuclei is generated, which subsequently grows to nanosheets. As the hydrothermal time prolonged, the thin nanosheets self-assembled gradually and form stacking flower-like spherical MoO<sub>3</sub> structures onto the activated carbon scaffold.<sup>7</sup>

### **References**

- [1] V. Sahu, M. Mishra, G. Singh, R. K. Sharma, Turning Hazardous Diesel Soot into High Performance Carbon/MnO<sub>2</sub> Supercapacitive Energy Storage Material, ACS Sustainable Chem. Eng. 5 (2017) 450–459.
- [2] K. V. Sankar, S. Surendran, K. Pandi, A. M. Allin, V. D. Nithya, Y. S. Lee, Selvan,

R. K. Studies on the electrochemical intercalation/de-intercalation mechanism of  $\text{NiMn}_2\text{O}_4$  for high stable pseudocapacitor electrodes, *RSC Adv.* 5 (2015) 27649–27656.

[3] M. Sathiya, A. S. Prakash, K. Ramesh, J. M. Tarascon, A. K. Shukla,  $\text{V}_2\text{O}_5$ -Anchored Carbon Nanotubes for Enhanced Electrochemical Energy Storage, *J. Am. Chem. Soc.* 133 (2011) 1629–16299.

[4] J. Zhang, X. S. Zhao, On the Configuration of Supercapacitors for Maximizing Electrochemical Performance, *ChemSusChem* 5 (2012) 818–841.

[5] W. Sugimoto, H. Iwata, Y. Yasunaga, Y. Murakami, Y. Takasu, Preparation of Ruthenic Acid Nanosheets and Utilization of Its Interlayer Surface for Electrochemical Energy Storage, *Angew. Chem. Int. Ed.* 42 (2003) 4092–4096.

[6] S. Lalwani, V. Sahu, R. B. Marichi, G. Singh, R. K. Sharma, In situ immobilized, magnetite nanoplatelets over holey graphene nanoribbons for high performance solid state supercapacitor, *Electrochimica Acta* 224 (2017) 517–526.

[7] Y. Liu, W. Zheng, Facile synthesis of 3D flower-like  $\text{MoO}_3$  and its gas sensor application, *J Mater Sci: Mater Electron* 27 (2016) 12996–13001.
